# Supplementary material
Source: HighWire-hosted journal article supplement (https://oem.bmj.com/content/80/1/27)
Supplement: inline-supplementary-material-1 [file inline-supplementary-material-1.pdf]

**Supplementary table 1.** Univariate analyses for demographics and outcomes\* between non-respondents compared to respondents for each specific measurement.

|                                       | Measurement 2<br>July 2020                            | Measurement 3<br>November 2020                        | Measurement 4<br>March 2021                           | Measurement 5<br>November 2021                        |
|---------------------------------------|-------------------------------------------------------|-------------------------------------------------------|-------------------------------------------------------|-------------------------------------------------------|
|                                       | Non-respondents vs.<br>respondents<br>(n = 605/1,310) | Non-respondents<br>vs. respondents<br>(n = 673/1,242) | Non-respondents<br>vs. respondents<br>(n = 781/1,134) | Non-respondents<br>vs. respondents<br>(n = 913/1,002) |
|                                       | OR (95% CI)                                           | OR (95% CI)                                           | OR (95% CI)                                           | OR (95% CI)                                           |
| <b>Age</b>                            |                                                       |                                                       |                                                       |                                                       |
| 19-34                                 | 1.11 (0.83, 1.48)                                     | 1.08 (0.77, 1.53)                                     | 1.27 (0.88, 1.84)                                     | 1.13 (0.76, 1.67)                                     |
| 35-44                                 | Ref                                                   | Ref                                                   | Ref                                                   | Ref                                                   |
| 45-54                                 | 0.89 (0.66, 1.20)                                     | 0.80 (0.56, 1.15)                                     | 0.73 (0.49, 1.07)                                     | <b>0.58 (0.39, 0.86)</b>                              |
| 55-65                                 | 0.76 (0.57, 1.01)                                     | <b>0.59 (0.42, 0.83)</b>                              | <b>0.65 (0.46, 0.94)</b>                              | 0.74 (0.51, 1.05)                                     |
| <b>Sex</b>                            |                                                       |                                                       |                                                       |                                                       |
| Male                                  | 0.87 (0.68, 1.13)                                     | 0.99 (0.74, 1.34)                                     | 1.09 (0.80, 1.49)                                     | 0.92 (0.66, 1.28)                                     |
| Female                                | Ref                                                   | Ref                                                   | Ref                                                   | Ref                                                   |
| <b>Household composition</b>          |                                                       |                                                       |                                                       |                                                       |
| Single                                | 1.16 (0.90, 1.49)                                     | 0.81 (0.60, 1.09)                                     | 0.93 (0.68, 1.28)                                     | 0.93 (0.68, 1.28)                                     |
| Having a partner                      | 1.15 (0.92, 1.44)                                     | <b>0.61 (0.46, 0.80)</b>                              | 0.91 (0.69, 1.21)                                     | 0.83 (0.62, 1.10)                                     |
| Having a partner with child(ren)      | Ref                                                   | Ref                                                   | Ref                                                   | Ref                                                   |
| <b>Level of education</b>             |                                                       |                                                       |                                                       |                                                       |
| Low                                   | 0.80 (0.52, 1.25)                                     | 0.94 (0.57, 1.56)                                     | 0.79 (0.46, 1.38)                                     | 1.15 (0.69, 1.93)                                     |
| Middle                                | 1.00 (0.82, 1.22)                                     | 1.08 (0.85, 1.37)                                     | 0.95 (0.73, 1.22)                                     | 0.97 (0.75, 1.26)                                     |
| High                                  | Ref                                                   | Ref                                                   | Ref                                                   | Ref                                                   |
| Working hours per week**              | 1.00 (0.99, 1.01)                                     | -                                                     | 0.99 (0.98, 1.01)                                     | 1.01 (0.99, 1.03)                                     |
| <b>Subgroup***</b>                    |                                                       |                                                       |                                                       |                                                       |
| Working with COVID-19 patients        | -                                                     | <b>1.53 (1.02, 2.30)</b>                              | 1.25 (0.87, 1.79)                                     | 0.88 (0.61, 1.27)                                     |
| Working with other patients           | -                                                     | <b>1.39 (1.07, 1.81)</b>                              | 1.01 (0.77, 1.34)                                     | 0.79 (0.59, 1.05)                                     |
| Not working with patients             | -                                                     | Ref                                                   | Ref                                                   | Ref                                                   |
| <b>Working conditions (mean, SD)</b>  |                                                       |                                                       |                                                       |                                                       |
| Job autonomy (1-3)                    | 0.87 (0.72, 1.06)                                     | <b>0.76 (0.61, 0.96)</b>                              | 0.93 (0.73, 1.18)                                     | 0.88 (0.69, 1.13)                                     |
| Psychological job demands (1-4)       | 1.09 (0.93, 1.27)                                     | 1.01 (0.82, 1.24)                                     | 1.04 (0.84, 1.30)                                     | 1.13 (0.91, 1.42)                                     |
| Emotional demands (1-4)               | 0.96 (0.80, 1.14)                                     | 0.99 (0.79, 1.24)                                     | 1.07 (0.85, 1.36)                                     | 1.07 (0.83, 1.38)                                     |
| Social support from colleagues (1-4)  | 1.09 (0.91, 1.29)                                     | 1.02 (0.82, 1.26)                                     | 0.94 (0.75, 1.19)                                     | 0.82 (0.63, 1.05)                                     |
| Social support from supervisor (1-4)  | 0.98 (0.85, 1.14)                                     | <b>0.83 (0.69, 0.99)</b>                              | 1.02 (0.84, 1.24)                                     | 1.00 (0.81, 1.23)                                     |
| Emotional exhaustion (1-7) (mean, SD) | 0.98 (0.90, 1.06)                                     | 1.00 (0.91, 1.10)                                     | <b>1.13 (1.03, 1.25)</b>                              | 1.08 (0.97, 1.19)                                     |

Bold indicates statistical significance ( $p < 0.05$ ). \*Outcomes and characteristics were retrieved from the previous measurement.

\*\*N/A for measurement 2. \*\*\*N/A for measurement 1.

**Supplementary table 2.** Hedges d effect sizes comparing healthcare workers working with (COVID-19) patients and healthcare workers not working with patients on changes in working conditions during the COVID-19 pandemic compared to baseline scores.

|                                      | Working with COVID-19<br>patients vs. not working<br>with patients<br>Hedges d | Working with other<br>patients vs. not working<br>with patients<br>Hedges d |
|--------------------------------------|--------------------------------------------------------------------------------|-----------------------------------------------------------------------------|
| Working conditions                   |                                                                                |                                                                             |
| Job autonomy (1-3)                   | 0.20                                                                           | 0.13                                                                        |
| Psychological job demands (1-4)      | 0.10                                                                           | 0.05                                                                        |
| Emotional demands (1-4)              | 0.16                                                                           | 0.10                                                                        |
| Social support from colleagues (1-4) | 0.10                                                                           | 0.04                                                                        |
| Social support from supervisor (1-4) | 0.08                                                                           | 0.06                                                                        |

**Supplementary table 3.** Characteristics of healthcare workers in the Netherlands (n = 1,915 at baseline) by period of measurement, stratified by sex.

|                                       | Measurement 1<br>November 2019<br>(n = 1,915) |                      | Measurement 2<br>July 2020<br>(n = 1,310) |                      | Measurement 3<br>November 2020<br>(n = 1,192) |                     | Measurement 4<br>March 2021<br>(n = 1,046) |                     | Measurement 5<br>November 2021<br>(n = 819) |                     |
|---------------------------------------|-----------------------------------------------|----------------------|-------------------------------------------|----------------------|-----------------------------------------------|---------------------|--------------------------------------------|---------------------|---------------------------------------------|---------------------|
|                                       | Male<br>(n = 352)                             | Female<br>(n = 1563) | Male<br>(n = 249)                         | Female<br>(n = 1061) | Male<br>(n = 222)                             | Female<br>(n = 970) | Male<br>(n = 185)                          | Female<br>(n = 861) | Male<br>(n = 148)                           | Female<br>(n = 671) |
| Age                                   |                                               |                      |                                           |                      |                                               |                     |                                            |                     |                                             |                     |
| 19-34                                 | 73 (21%)                                      | 433 (28%)            | 48 (19%)                                  | 277 (26%)            | 40 (18%)                                      | 244 (25%)           | 23 (13%)                                   | 201 (23%)           | 19 (13%)                                    | 131 (20%)           |
| 35-44                                 | 61 (17%)                                      | 295 (19%)            | 43 (17%)                                  | 194 (18%)            | 37 (17%)                                      | 170 (18%)           | 33 (18%)                                   | 151 (18%)           | 20 (13%)                                    | 130 (19%)           |
| 45-54                                 | 74 (21%)                                      | 364 (23%)            | 56 (23%)                                  | 247 (23%)            | 50 (22%)                                      | 236 (24%)           | 45 (24%)                                   | 211 (24%)           | 41 (28%)                                    | 181 (27%)           |
| 55-65                                 | 144 (41%)                                     | 471 (30%)            | 102 (41%)                                 | 343 (33%)            | 95 (43%)                                      | 320 (33%)           | 84 (45%)                                   | 298 (35%)           | 68 (46%)                                    | 229 (34%)           |
| Household composition                 |                                               |                      |                                           |                      |                                               |                     |                                            |                     |                                             |                     |
| Single                                | 71 (20%)                                      | 359 (23%)            | 52 (21%)                                  | 236 (22%)            | 41 (19%)                                      | 234 (24%)           | 31 (17%)                                   | 218 (26%)           | 26 (18%)                                    | 159 (24%)           |
| Having a partner                      | 133 (38%)                                     | 505 (32%)            | 87 (35%)                                  | 341 (32%)            | 90 (40%)                                      | 328 (34%)           | 68 (37%)                                   | 287 (33%)           | 57 (38%)                                    | 218 (32%)           |
| Having a partner with child(ren)      | 148 (42%)                                     | 699 (45%)            | 110 (44%)                                 | 484 (46%)            | 91 (41%)                                      | 408 (42%)           | 86 (46%)                                   | 356 (41%)           | 65 (44%)                                    | 294 (44%)           |
| Level of education                    |                                               |                      |                                           |                      |                                               |                     |                                            |                     |                                             |                     |
| Low                                   | 17 (5%)                                       | 93 (6%)              | 12 (5%)                                   | 68 (6%)              | 13 (6%)                                       | 56 (6%)             | 10 (6%)                                    | 57 (7%)             | 8 (5%)                                      | 40 (6%)             |
| Middle                                | 108 (31%)                                     | 657 (42%)            | 78 (31%)                                  | 444 (42%)            | 68 (31%)                                      | 400 (41%)           | 56 (30%)                                   | 363 (42%)           | 46 (31%)                                    | 286 (43%)           |
| High                                  | 227 (64%)                                     | 809 (52%)            | 159 (64%)                                 | 547 (52%)            | 141 (63%)                                     | 511 (53%)           | 119 (64%)                                  | 441 (51%)           | 94 (64%)                                    | 343 (51%)           |
| Working hours per week (mean, SD)*    | 32.34 (9.66)                                  | 25.67 (8.36)         | -                                         | -                    | 34.74 (6.64)                                  | 27.43 (6.82)        | 35.10 (5.97)                               | 27.09 (6.72)        | 34.43 (7.27)                                | 26.92 (7.07)        |
| Subgroup                              |                                               |                      |                                           |                      |                                               |                     |                                            |                     |                                             |                     |
| Working with COVID-19 patients        | -                                             | -                    | 25 (10%)                                  | 110 (10%)            | 35 (16%)                                      | 158 (16%)           | 28 (15%)                                   | 149 (17%)           | 30 (20%)                                    | 139 (21%)           |
| Working with other patients           | -                                             | -                    | 93 (37%)                                  | 556 (52%)            | 72 (32%)                                      | 468 (48%)           | 57 (31%)                                   | 413 (48%)           | 45 (30%)                                    | 328 (49%)           |
| Not working with patients             | -                                             | -                    | 120 (48%)                                 | 347 (33%)            | 108 (49%)                                     | 310 (32%)           | 90 (49%)                                   | 259 (30%)           | 68 (46%)                                    | 174 (26%)           |
| Working conditions (mean, SD)         |                                               |                      |                                           |                      |                                               |                     |                                            |                     |                                             |                     |
| Job autonomy (1-3)                    | 2.51 (0.48)                                   | 2.37 (0.49)          | 2.48 (0.50)                               | 2.29 (0.52)          | 2.52 (0.49)                                   | 2.29 (0.52)         | 2.51 (0.51)                                | 2.29 (0.52)         | 2.51 (0.51)                                 | 2.29 (0.52)         |
| Psychological job demands (1-4)       | 2.33 (0.61)                                   | 2.47 (0.63)          | 2.25 (0.53)                               | 2.36 (0.58)          | 2.27 (0.54)                                   | 2.37 (0.59)         | 2.25 (0.55)                                | 2.32 (0.58)         | 2.32 (0.61)                                 | 2.41 (0.65)         |
| Emotional demands (1-4)               | 2.15 (0.59)                                   | 2.22 (0.54)          | 2.15 (0.58)                               | 2.21 (0.51)          | 2.09 (0.58)                                   | 2.20 (0.52)         | 2.04 (0.56)                                | 2.16 (0.50)         | 2.11 (0.65)                                 | 2.19 (0.52)         |
| Social support from colleagues (1-4)  | 3.39 (0.55)                                   | 3.44 (0.57)          | 3.40 (0.55)                               | 3.49 (0.55)          | 3.44 (0.50)                                   | 3.49 (0.55)         | 3.43 (0.51)                                | 3.49 (0.52)         | 3.45 (0.50)                                 | 3.49 (0.55)         |
| Social support from supervisor (1-4)  | 3.05 (0.65)                                   | 3.01 (0.66)          | 3.08 (0.64)                               | 3.08 (0.68)          | 3.12 (0.64)                                   | 3.07 (0.68)         | 3.22 (0.65)                                | 3.09 (0.64)         | 3.12 (0.62)                                 | 3.06 (0.68)         |
| Emotional exhaustion (1-7) (mean, SD) | 2.27 (1.24)                                   | 2.36 (1.25)          | 2.27 (1.17)                               | 2.46 (1.26)          | 2.25 (1.21)                                   | 2.44 (1.25)         | 2.15 (1.16)                                | 2.40 (1.26)         | 2.21 (1.22)                                 | 2.58 (1.39)         |

\*N/A for measurement 2.

**Supplementary table 4.** Linear mixed model estimates for differences across healthcare workers in psychosocial working conditions and emotional exhaustion during the COVID-19 period (measurement 2-5), without correction for hospital pressure and baseline scores (measurement 1)

|                                | Job autonomy (1-3)          | Psychological job demands (1-4) | Emotional demands (1-4)  | Social support from colleagues (1-4) | Social support from supervisor (1-4) | Emotional exhaustion (1-7) |
|--------------------------------|-----------------------------|---------------------------------|--------------------------|--------------------------------------|--------------------------------------|----------------------------|
|                                | $\beta$ (95% CI)            | $\beta$ (95% CI)                | $\beta$ (95% CI)         | $\beta$ (95% CI)                     | $\beta$ (95% CI)                     | $\beta$ (95% CI)           |
| <b>Subgroup</b>                |                             |                                 |                          |                                      |                                      |                            |
| Working with COVID-19 patients | <b>-0.23 (-0.27, -0.18)</b> | <b>0.15 (0.10, 0.20)</b>        | <b>0.19 (0.14, 0.24)</b> | <b>0.07 (0.01, 0.12)</b>             | <b>-0.11 (-0.18, -0.04)</b>          | 0.11 (-0.003, 0.22)        |
| Working with other patients    | <b>-0.15 (-0.18, -0.12)</b> | <b>0.08 (0.04, 0.12)</b>        | <b>0.15 (0.11, 0.18)</b> | 0.03 (-0.01, 0.07)                   | <b>-0.10 (-0.16, -0.05)</b>          | 0.06 (-0.02, 0.15)         |
| Not working with patients      | Ref                         | Ref                             | Ref                      | Ref                                  | Ref                                  | Ref                        |

Bold indicates statistical significance ( $p < 0.05$ ). Analyses were corrected for sex, age, household composition, level of education and working hours.

**Supplementary table 5.** Linear fixed effects regression model estimates for the effect of change between working with other patients and working with COVID-19 patients on change in psychosocial working conditions and emotional exhaustion during the COVID-19 period (measurement 2-5), with and without adjusting for hospital pressure.

|                 | Job autonomy (1-3) |                            | Psychological job demands (1-4) |                            | Emotional demands (1-4) |                            | Social support from colleagues (1-4) |                            | Social support from supervisor (1-4) |                            | Emotional exhaustion (1-7) |                            |
|-----------------|--------------------|----------------------------|---------------------------------|----------------------------|-------------------------|----------------------------|--------------------------------------|----------------------------|--------------------------------------|----------------------------|----------------------------|----------------------------|
|                 | $\beta$ (95% CI)   |                            | $\beta$ (95% CI)                |                            | $\beta$ (95% CI)        |                            | $\beta$ (95% CI)                     |                            | $\beta$ (95% CI)                     |                            | $\beta$ (95% CI)           |                            |
|                 | No adjustment      | Adj. for hospital pressure | No adjustment                   | Adj. for hospital pressure | No adjustment           | Adj. for hospital pressure | No adjustment                        | Adj. for hospital pressure | No adjustment                        | Adj. for hospital pressure | No adjustment              | Adj. for hospital pressure |
| <b>Subgroup</b> | -0.02              | -0.02                      | 0.01                            | 0.01                       | 0.02                    | 0.03                       | <b>0.05</b>                          | <b>0.06</b>                | -0.01                                | -0.02                      | <b>0.11</b>                | <b>0.11</b>                |
|                 | (-0.05, 0.01)      | (-0.05, 0.02)              | (-0.03, 0.05)                   | (-0.03, 0.05)              | (-0.02, 0.06)           | (-0.01, 0.07)              | <b>(0.01, 0.10)</b>                  | <b>(0.01, 0.10)</b>        | (-0.07, 0.05)                        | (-0.08, 0.04)              | <b>(0.03, 0.20)</b>        | <b>(0.02, 0.19)</b>        |

Bold indicates statistical significance ( $p < 0.05$ ).
